# Supplementary material for: Realistic boundary conditions in SimVascular through inlet catheter modeling
Source: PubMed Central journal article supplement (PMC8186195; doi:10.1186/s13104-021-05631-7), 2021-05-31
Supplement: 13104_2021_5631_MOESM1_ESM.pdf [file 13104_2021_5631_MOESM1_ESM.pdf]

## ADDITIONAL FILE 1

# Realistic boundary conditions in SimVascular through inlet catheter modeling

Amirtahà Taebi<sup>1</sup>, Selin Berk<sup>2</sup>, Emilie Roncali<sup>1,3</sup>

<sup>1</sup> Department of Biomedical Engineering, University of California, Davis, One Shields Ave., Davis, CA 95616, USA

<sup>2</sup> Department of Mechanical and Aerospace Engineering, University of California, Los Angeles, 420 Westwood Plaza, Los Angeles, CA 90095-1597

<sup>3</sup> Department of Radiology, University of California, Davis, 4860 Y Street, Suite 3100, Sacramento, CA 95817, USA

## Introduction

In this study, the velocity distribution outside of the catheter is calculated based on the analytical solution provided in the previous studies [1, 2]. A brief overview of this solution is described here.

## Methods

To calculate the velocity distribution outside of the catheter, the following assumptions were made:

- The catheter centerline is parallel to the arterial centerline.
- The vessel cross-section is circular. Therefore, the vessel and catheter form an eccentric annulus (Fig. S1).
- The annulus is long enough that the flow becomes fully developed.

The flow in the eccentric annulus was solved using the following transformation [1]

$$x + iy = ic \cot((\sigma + i\tau)/2) \quad (1)$$

$$c = R \sinh \alpha = r_v \sinh \beta \quad (2)$$

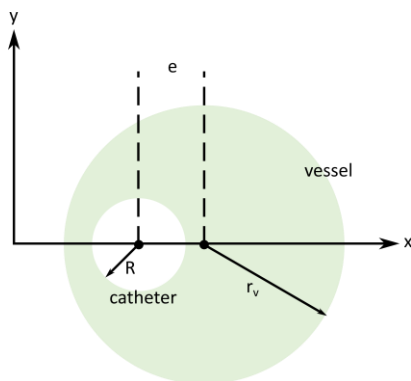

**Fig. S1** Eccentric annulus formed between the vessel and the catheter.

where  $c$  is a constant,  $i = (-1)^{1/2}$ ,  $(\tau, \sigma)$  are the bipolar coordinates,  $R$  is the catheter radius, and  $r_v$  is the vessel radius. In this bipolar system, the catheter and vessel are represented by  $\alpha$  and  $\beta$  which are lines of constant  $\tau$ . These lines can be calculated as [1]

$$\cosh \alpha = (\gamma(1 + \varphi^2) + (1 - \varphi^2))/2\gamma\varphi \quad (3)$$

$$\cosh \beta = (\gamma(1 - \varphi^2) + (1 + \varphi^2))/2\gamma\varphi \quad (4)$$

$$\gamma = R/r_v \quad (5)$$

$$\varphi = e/(r_v - R) \quad (6)$$

where  $e$  is the eccentricity. Considering the boundary conditions [2], the general solution of the equation of motion for fully-developed laminar flow may be written as [1]

$$u = F + E\tau - \coth \tau / 2 + \sum_{n=1}^{\infty} \{A_n e^{n\tau} + (B_n - \coth \tau) e^{-n\tau}\} \cos n\sigma \quad (7)$$

where  $u$  is the dimensionless velocity in the eccentric annulus between the vessel and the catheter, and

$$F = (\alpha \coth \beta - \beta \coth \alpha)/2(\alpha - \beta) \quad (8)$$

$$E = (\coth \alpha - \coth \beta)/2(\alpha - \beta) \quad (9)$$

$$A_n = (\coth \alpha - \coth \beta)/(e^{2n\alpha} - e^{2n\beta}) \quad (10)$$

$$B_n = (e^{2n\alpha} \coth \beta - e^{2n\beta} \coth \alpha)/(e^{2n\alpha} - e^{2n\beta}) \quad (11)$$

## References

1. Snyder WT, Goldstein GA. An analysis of fully developed laminar flow in an eccentric annulus. *AICHE J.* 1965;11:462–7. doi:10.1002/aic.690110319.
2. Kolutawong C, Giacomini AJ. Axial flow between eccentric cylinders. *Polym Plast Technol Eng.* 2001;40:363–84. doi:10.1081/PPT-100000254.
